# Supplementary material for: In Skeletal Muscle Fibers, Protein Kinase Subunit CSNK2A1/CK2α Is Required for Proper Muscle Homeostasis and Structure and Function of Neuromuscular Junctions
Source: MDPI journal article supplement (doi:10.3390/cells11243962), 2022-12-07
Supplement: s1 [file s1]

## SUPPLEMENTARY DATA

**Supplementary Table S1.** Tabular presentation of oligonucleotide sequences.

| Genomic target | Orientation | Sequence                           |
|----------------|-------------|------------------------------------|
| Rpl8 qPCR      | forward     | GTTCGTGTACTGCGGCAAGA               |
|                | reverse     | ACAGGATTCATGGCCACACC               |
| Csnk2a1 qPCR   | forward     | CAGCAGCAATCACTGGTGAG               |
|                | reverse     | TGAGGATAGCCAAGGTTCTG               |
| Csnk2a2 qPCR   | forward     | TGACCAGCTTGTTCTGAATTGCC            |
|                | reverse     | TGTTCTCAGCACAAGGCTGG               |
| Csnk2b qPCR    | forward     | TCTGTGAGGTGGATGAAGAC               |
|                | reverse     | TGTGGATGCACCATGAAGAG               |
| Myod1 qPCR     | forward     | TGGCATGATGGATTACAGCGG              |
|                | reverse     | GGTCTGGGTTCCTGTTCTG                |
| Myog qPCR      | forward     | CAGTACATTGAGCGCTACA                |
|                | reverse     | GCCTGACAGACAATCTCAGT               |
| Pax7 qPCR      | forward     | GCTACCAGTACAGCCAGTATG              |
|                | reverse     | GTCACTAAGCATGGGTAGATG              |
| Myf5 qPCR      | forward     | ATCCGCTACATTGAGAGCCT               |
|                | reverse     | GATGGCTCTGTAGACGTGAT               |
| Chrna1 qPCR    | forward     | ACGCTGAGCATCTCTGTCTT               |
|                | reverse     | TTGGACTCCTGGTCTGACTT               |
| Chrn b qPCR    | forward     | ATAGGTACCCAGCATACCATATCAGA<br>ACG  |
|                | reverse     | ATACTCGAGCTGAACGGATCAAGAAC<br>CAC  |
| Chrng qPCR     | forward     | GGTCAATGTCAGCCTGAAGC               |
|                | reverse     | GCACATGCATCCGTAACAGC               |
| Chrnd qPCR     | forward     | ATGAGGAACAAAGGCTGATCCA             |
|                | reverse     | ACAGTGATGTTCCCGAAGTCGT             |
| Chrne qPCR     | forward     | ATAGGTACCCAAGTCCGTTCCCTGAGC<br>ACG |
|                | reverse     | ATACTCGAGCAAGTATCTGCAGCAGG<br>CCA  |
| Rapsn qPCR     | forward     | CCGCTACAGGCACTCTGTCT               |
|                | reverse     | TCAGTCTCCTCCACGCACTC               |
| Musk qPCR      | forward     | GCCTTGTTGAAGAAGTAGC                |
|                | reverse     | CTTGATCCAGGACACAGATG               |
| Dok7 qPCR      | forward     | GAATTCGGTTCTCTGCTCAGTCTG           |
|                | reverse     | CCAAGTCCATGTAGTGCAGCTG             |
